# Supplementary material for: The GATA transcription factor/MTA-1 homolog egr-1 promotes longevity and stress resistance in Caenorhabditis elegans
Source: PubMed Central journal article supplement (PMC4331783; doi:10.1111/acel.12179), 2013-12-06

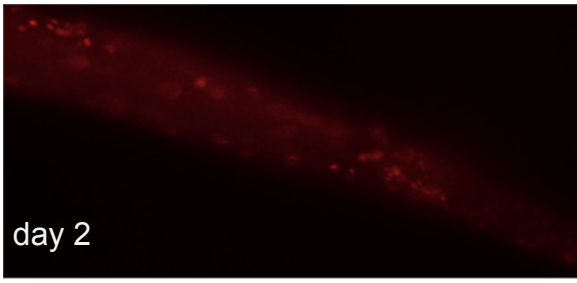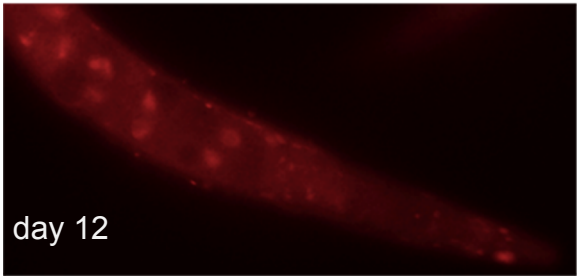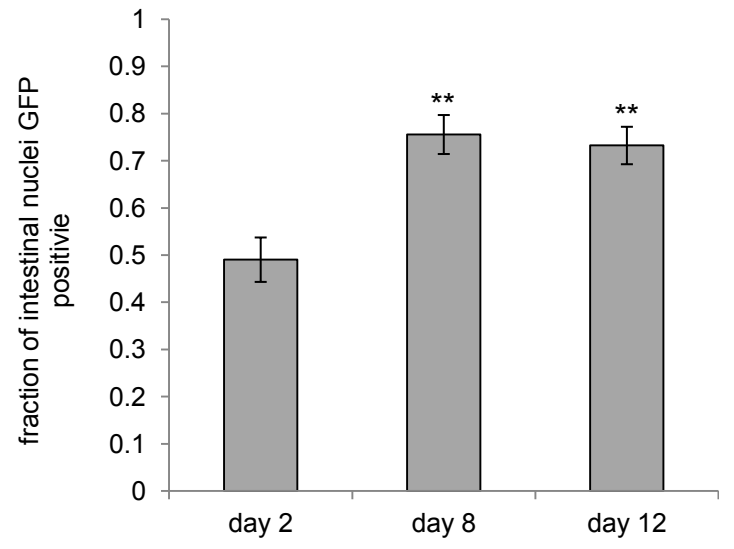

Supplement: acel0013-0329-sd4.pdf [file acel0013-0329-sd4.pdf]
